# Supplementary material
Source: PubMed Central journal article supplement (PMC9663317)
Supplement: mmc1.pdf [file mmc1.pdf]

**Supplemental information**

**Extended SARS-CoV-2 RBD booster  
vaccination induces humoral and cellular  
immune tolerance in mice**

**Feng-Xia Gao, Rui-Xin Wu, Mei-Ying Shen, Jing-Jing Huang, Ting-Ting Li, Chao Hu, Fei-Yang Luo, Shu-Yi Song, Song Mu, Ya-Nan Hao, Xiao-Jian Han, Ying-Ming Wang, Luo Li, Sheng-Long Li, Qian Chen, Wang Wang, and Ai-Shun Jin**

Figure S1

A.

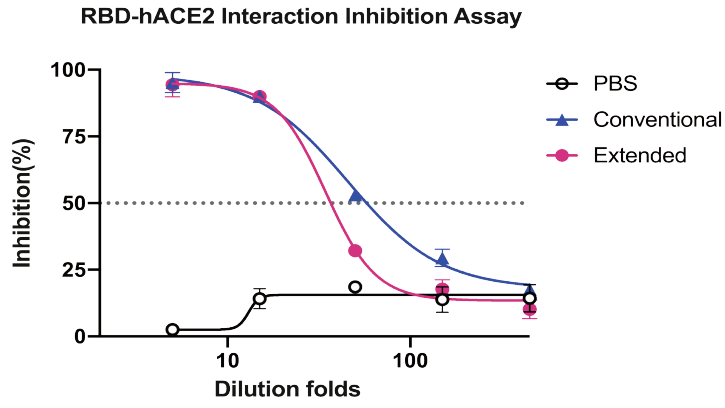

B.

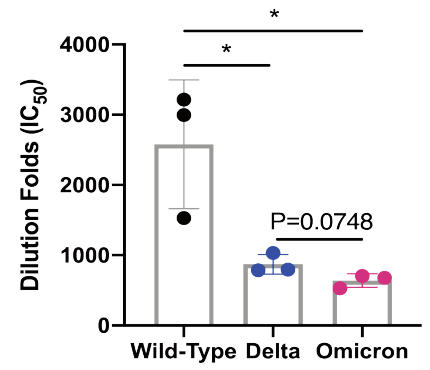

C.

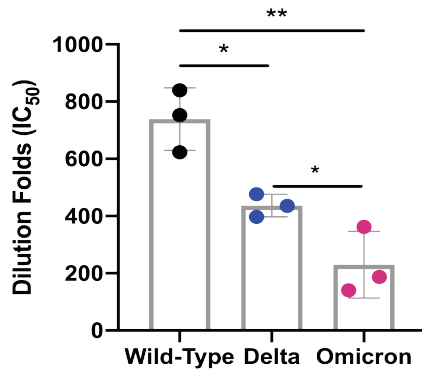

D.

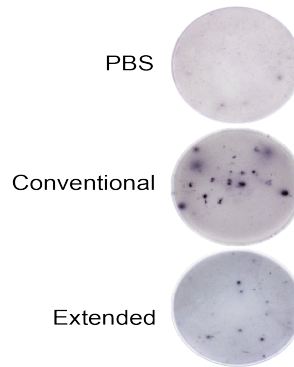

Figure S1. Extended immunization inefficiently induced humoral immunity in Balb/c mice. Related to Figure 2 and Figure 3.

(A) The RBD blocking ability of mice serum was determined by RBD-hACE2 interaction inhibition assay. Pseudo-viruses neutralization curves for SARS-CoV-2 (wild-type), Delta and Omicron strains by mice sera taken 7 days following the last dose of the conventional vaccination group. Comparison of neutralization titers between SARS-CoV-2 (wild-type) and 2 variant strains for the conventional vaccination serum (B) or the extended immunization serum (C). Points represent individual mice in (B) and (C). (D) ELISPOT results of RBD-specific memory B cells in the spleen of mice after last immunization. Results were expressed as the numbers of RBD-specific IgG spots per  $5 \times 10^5$  splenocytes of each mouse, subtracted those from the corresponding DMSO groups. Data were representative of two independent experiments. Data were presented as mean  $\pm$  (SEM). \*  $P < 0.05$ , \*\*  $P < 0.01$ .

Figure S2

A.

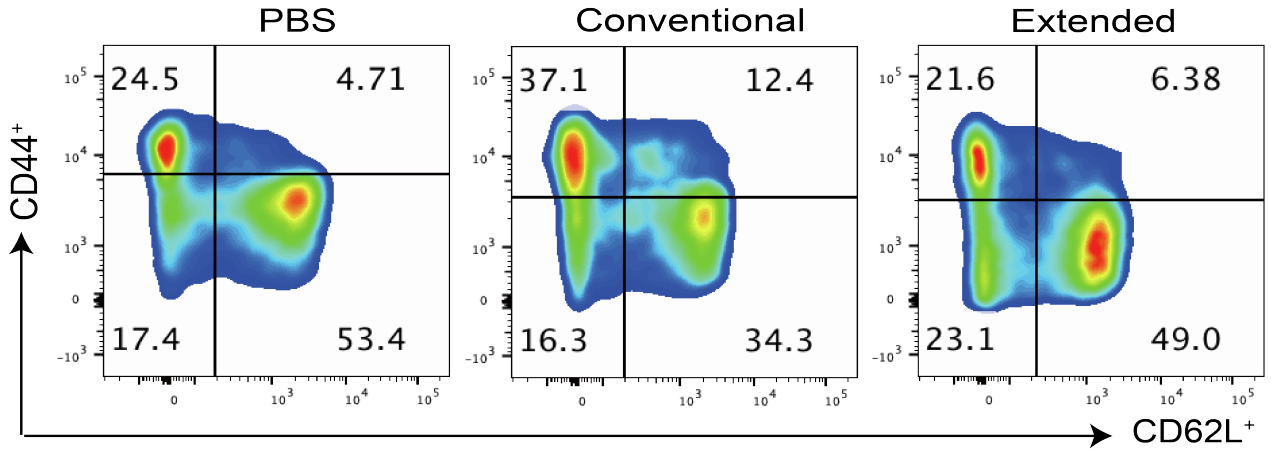

B.

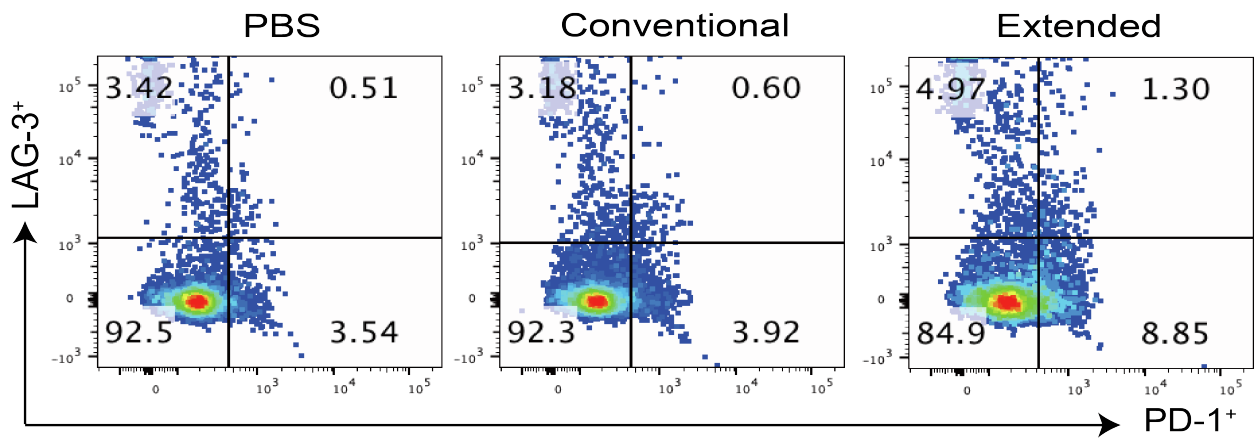

C.

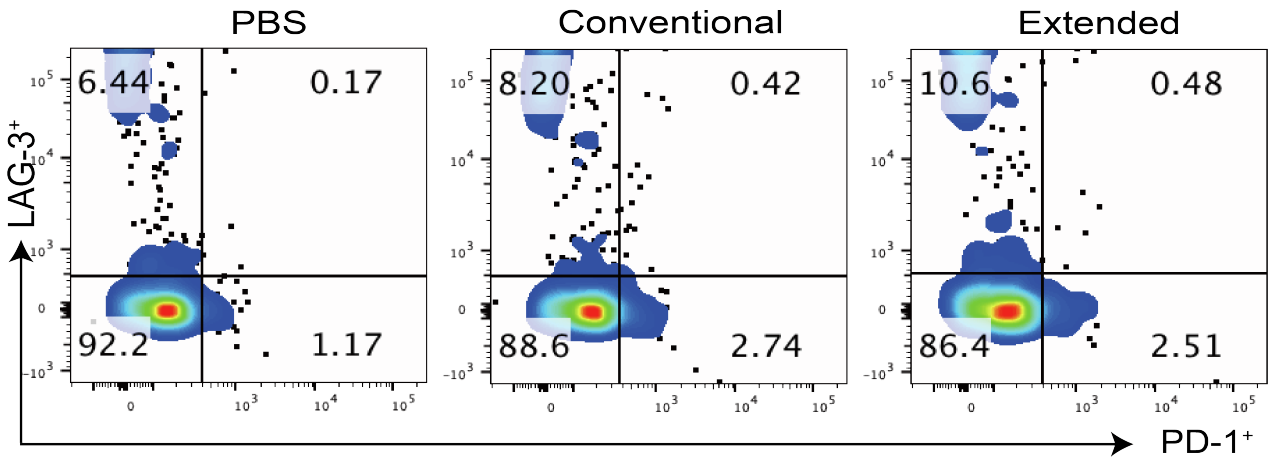

D.

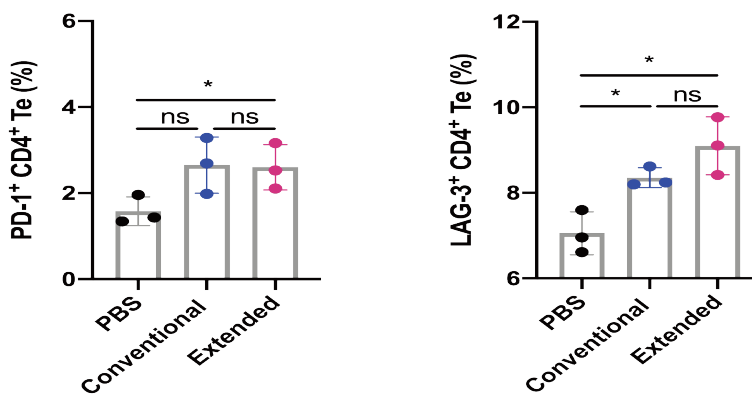

Figure S2. Extended immunization inhibited the activation of CD4<sup>+</sup> T cell immune responses. Related to Figure 5.

(A) The ratio of Tn (CD62L<sup>+</sup> CD44<sup>-</sup>), Te (CD62L<sup>-</sup> CD44<sup>-</sup>), Tem (CD62L<sup>-</sup> CD44<sup>+</sup>) and Tcm (CD62L<sup>+</sup> CD44<sup>+</sup>) of CD4<sup>+</sup> T cells on day 7 after the last immunization. (B) The expression of PD-1 and LAG-3 (gated on CD4<sup>+</sup> T cells) were detected on day 7 after the last immunization. (C-D) The expression of PD-1 and LAG-3 (gated on Te (CD62L<sup>-</sup> CD44<sup>-</sup>)) were detected. Points represent individual mice. Data were presented as mean  $\pm$  (SEM). \* P < 0.05. ns represented non-significant.

Figure S3

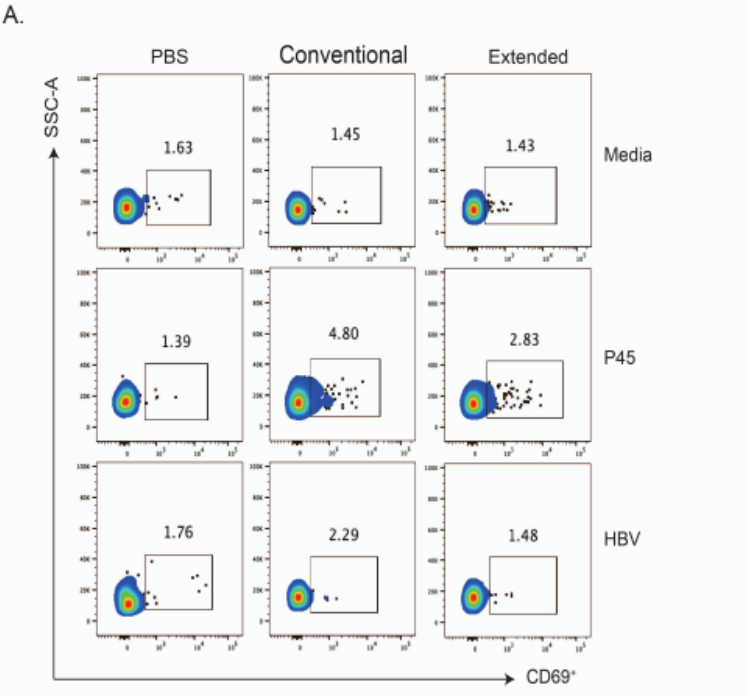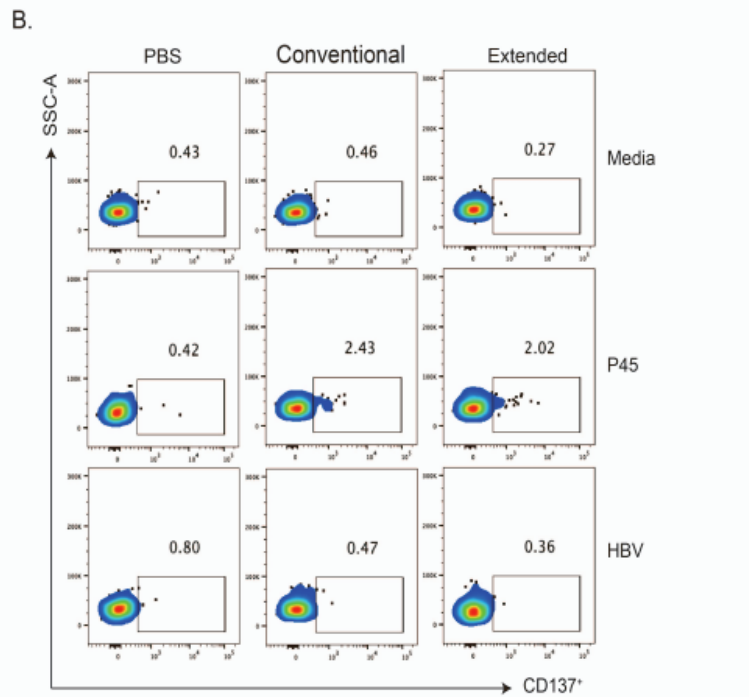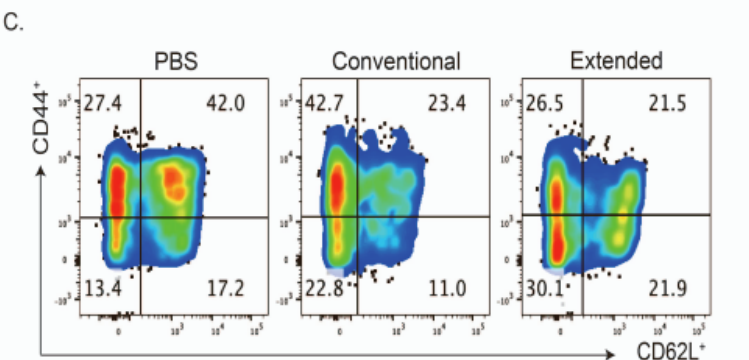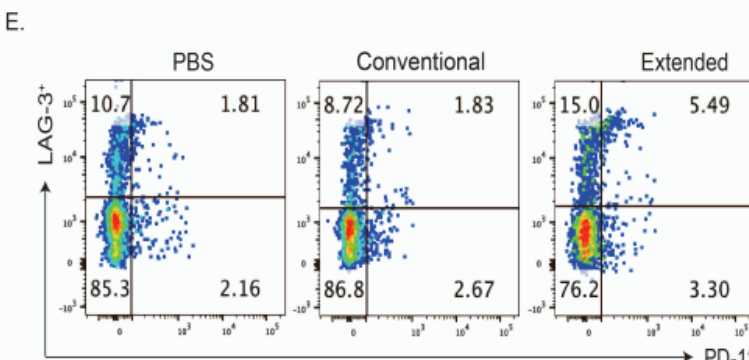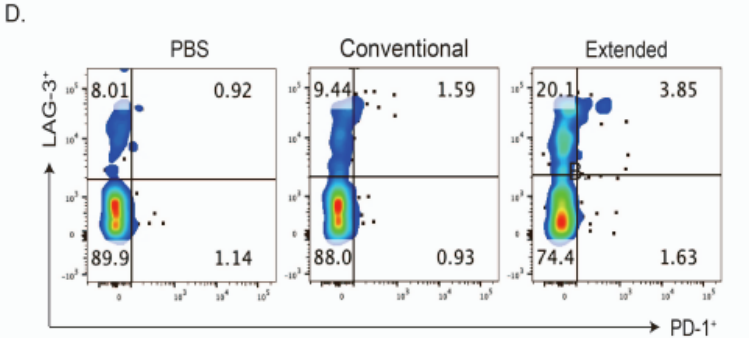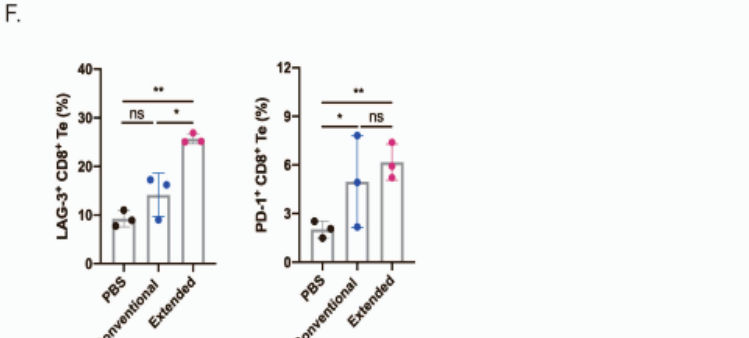

Figure S3. Extended immunization inhibited CD8+ T cell-mediated immune response. Related to Figure 6.

The expression of CD69 (A) and CD137 (B) in spleen (gated on CD8+ T cells) were detected by flow cytometry after 10 µg/mL RBD or HBV peptide stimulation for 24 hours, conventional media was used as negative control. ns represented non-significant. (C) The ratio of Tn (CD62L+ CD44-), Te (CD62L- CD44-), Tem (CD62L- CD44+) and Tcm (CD62L+ CD44+) of CD8+ T cells on day 7 after the last immunization. (D) The expression of PD-1 and LAG-3 (gated on CD8+ T cells) were detected on day 7 after the last immunization. (E-F) The expression of PD-1 and LAG-3 (gated on CD8+ T cells) were detected on day 7 after the last immunization. Data were presented as mean ± (SEM). \* P < 0.05, \*\* P < 0.01. ns represented non-significant.
